# Supplementary material for: Silanization induced inherent strain in graphene based filler influencing mechanical properties of polycarbonate urethane nanocomposite membranes
Source: Royal Society of Chemistry journal article supplement (doi:10.1039/c6ra21436c), 2016-01-01
Supplement: c6ra21436c1.pdf [file c6ra21436c1.pdf]

Electronic Supplementary Information (ESI)

**Silanization induced inherent strain in graphene based filler  
influencing mechanical properties of polycarbonate urethane  
nanocomposite membranes**

**Sudhin Thampi,<sup>1,2</sup> Vignesh Muthuvijayan,<sup>1</sup> Ramesh Parameswaran<sup>2\*</sup>**

1 Department of Biotechnology, Bhupat and Jyoti Mehta School of Biosciences, Indian Institute of Technology Madras, Chennai 600036, India

2 Division of Polymeric Medical devices, Biomedical Technology Wing, Sree Chitra Tirunal Institute for Medical Sciences and Technology, Thiruvananthapuram 695012, India

**\*Corresponding Author**

E - mail: [rameshsctimst@hotmail.com](mailto:rameshsctimst@hotmail.com)

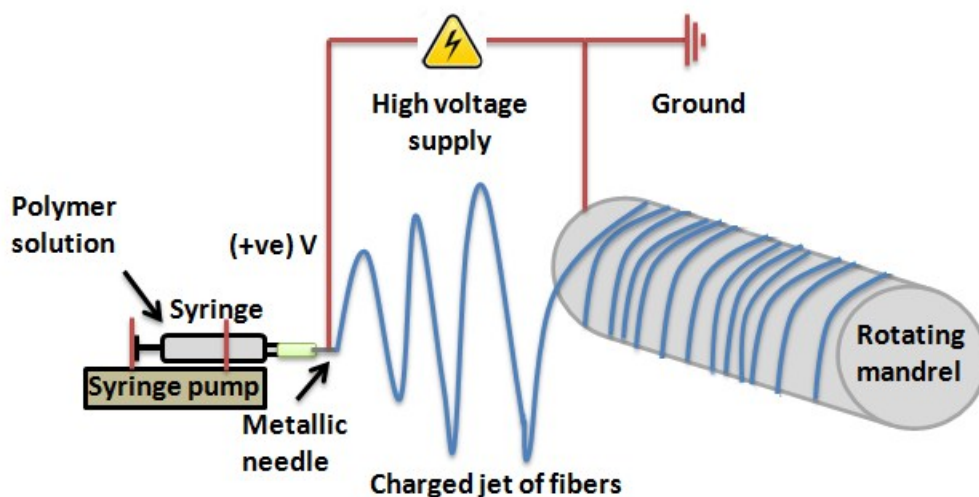

**Fig. S1** Schematic of electrospinning process.

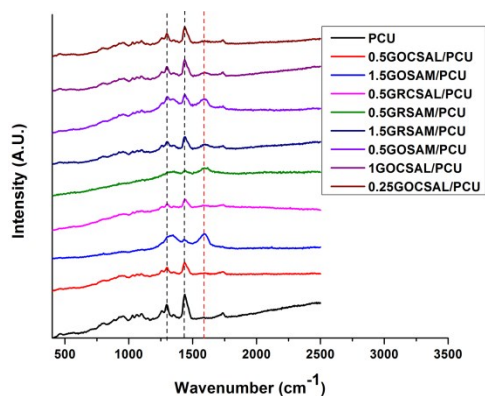

**Fig. S2** Raman spectra of nanocomposite membranes, black vertical line indicate characteristic peaks of PCU and red indicates G peak of fillers.

**Note:** There were no shifts observed in characteristic peaks of PCU in the nanocomposite membranes, while G peak of fillers under detectable volume could be seen in some of the spectra.

### Tan $\delta$

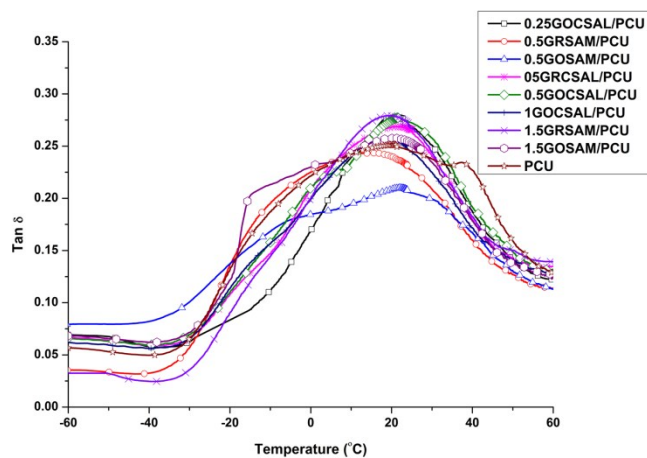

**Fig. S3** Tan  $\delta$  plots of PCU and nanocomposite membranes.

## Storage Modulus

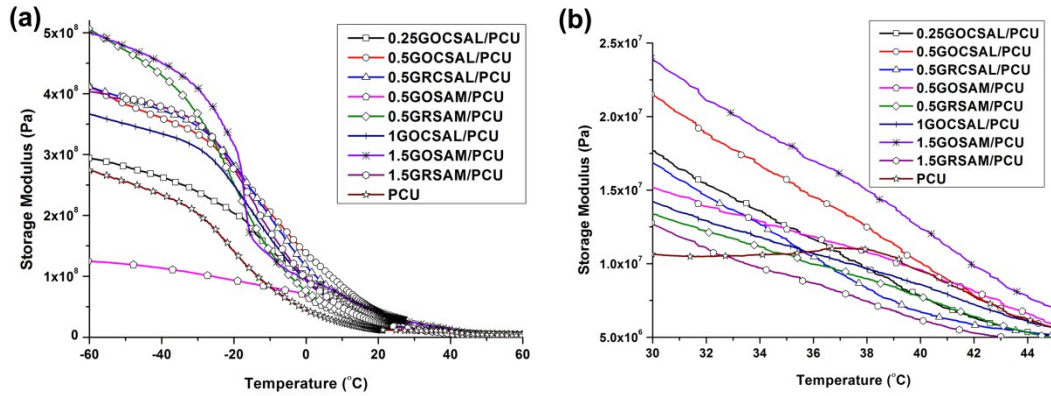

**Fig. S4** Storage Modulus plot of PCU and nanocomposite membranes for temperature range (a) -60°C to 60°C and (b) zoom view 30°C to 45°C.

## Loss Modulus

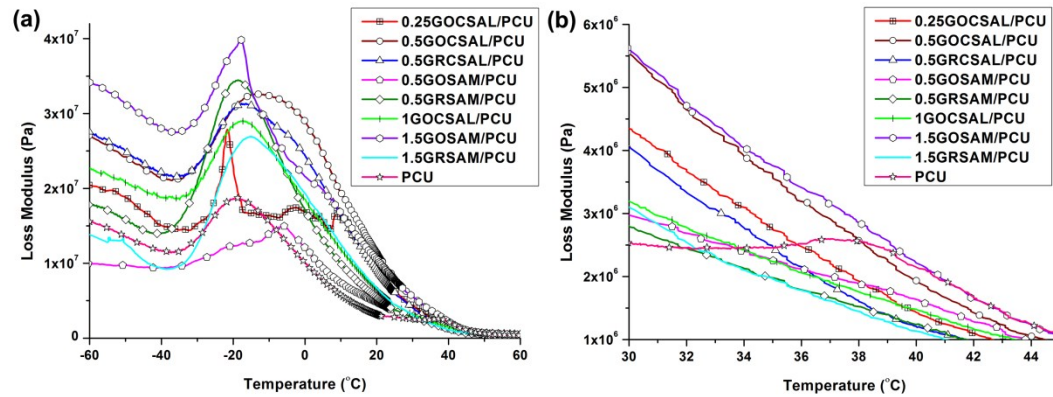

**Fig. S5** Loss Modulus ( $E''$ ) plot of PCU and nanocomposite membranes for temperature range (a) -60°C to 60°C and (b) zoom view 30°C to 45°C.
